# Supplementary material
Source: PubMed Central journal article supplement (PMC2414295)
Supplement: supp_M801923200_Table_S1.pdf [file supp_M801923200_Table_S1.pdf]

**Supplemental Table S1: Primers and annealing temperatures for genomic p53 sequencing**

| <b>Exon(s)</b> | <b>Forward primer<br/>Reverse primer</b>                                | <b>Annealing<br/>temp., °C</b> |
|----------------|-------------------------------------------------------------------------|--------------------------------|
| 2 and 3        | 5' -ACA CTG GCA TGG TGT TGG GG-3'<br>5' -CCC AAC CCT TGT CCT TAC CA-3'  | 65                             |
| 4              | 5' -AAG GAC AAG GGT TGG GCT GG-3'<br>5' -AGC CAA AGG GTG AAG AGG AA-3'  | 65                             |
| 5              | 5' -GGT GCT TAC GCA TGT TTG TT-3'<br>5' -GAT AAG ATG CTG AGG AGG GG-3'  | 55                             |
| 6              | 5' -ATG AGC GCT GCT CAG ATA GC-3'<br>5' -GGT CAA ATA AGC AGC AGG AG-3'  | 55                             |
| 7              | 5' -GAC AGA GCG AGA TTC CAT CT-3'<br>5' -TGG AAG AAA TCG GTA AGA GGT-3' | 55                             |
| 8              | 5' -CAA GGG TGG TTG GGA GTA GA-3'<br>5' -GGG CAG TGC TAG GAA AGA GG-3'  | 55                             |
| 9              | 5' -TAA GCG AGG TAA GCA AGC AG-3'<br>5' -TTG TCT TTG AGG CAT CAC TG-3'  | 55                             |
| 10             | 5' -GCT TTT GTA CCG TCA TAA AG-3'<br>5' -AAA AAA ATG TCT GTG CAG GG-3'  | 55                             |
