# Supplementary material
Source: PubMed Central journal article supplement (PMC2414295)
Supplement: supp_M801923200_Table_S2.pdf [file supp_M801923200_Table_S2.pdf]

**Supplemental Table S2: Primer sets for Q-RT-PCR.**

| <b>Gene (Alternative name)</b> | <b>Applied Biosystems primer set</b> |
|--------------------------------|--------------------------------------|
| BBC3 (PUMA)                    | Hs00248075_m1                        |
| MDM2                           | Hs01066938_m1                        |
| P21 (CDKN1A)                   | Hs00355782_m1                        |
| GADD45A                        | Hs00169255_m1                        |
| BCL2                           | Hs00608023_m1                        |
| BAX                            | Hs00180269_m1                        |
| TP53I3 (PIG3)                  | Hs00153280_m1                        |
| TP53INP1                       | Hs00264502_m1                        |
| TP53 (P53)                     | Hs00153349_m1                        |
| GUS- $\beta$                   | Hs99999908_m1                        |
| RPLP0                          | Hs99999902_m1                        |
